# Supplementary material
Source: publisher site journal article supplement (https://www.spandidos-publications.com/2884/downloadSupplementary)
Supplement: Supplementary file 1 [file downloadSupplementary]

## Sheet: Sheet1
Table SV. Expression levels of SOCS2, TAT, FOXO1, SPINK for ROC analysis.
Group	SOCS2	TAT	FOXO1	SPINK
T	3028.78	9544.16	94.67	11426.6
T	387.52	2386.54	119.08	1664.26
T	879.98	13786.9	135.04	8746.51
T	1247.3	12907.9	121.68	71.27
T	366.9	14054.3	108.09	153.84
T	467.01	615.19	79.87	10168.3
T	573.13	322.13	80.94	64.89
T	489.51	357.56	74.86	41.69
T	521.52	2553.81	72.03	8531.79
T	721.3	14355.7	116.31	27.1
T	656.69	5350.75	31.75	7478.82
T	166.03	7972.53	43.92	6100.2
T	125.78	9927.92	77.39	77.98
T	213.9	14628.4	82.19	124.31
T	643.75	15083.2	225.04	87.31
T	584.07	9660.49	84.82	9626.97
T	571.62	927.16	85.17	10450
T	290.67	1588.46	77.98	4801.45
T	973.35	8891.93	212.08	18.3
T	282.68	5938.48	45.52	10613.7
T	461.8	5544.61	63.93	127.11
T	109.19	465.72	42.61	6145.16
T	1010.97	6546.97	137.51	10903.3
T	1002.79	5158.51	76.53	10287.2
T	584.61	9954.35	98.89	1015.63
T	316.44	11424.9	96.25	968.35
T	190.37	1826.3	31.35	7403.95
T	347.2	2921.95	38.41	824.08
T	1696.6	12958.4	149.02	326.67
T	618.82	5463.46	58.32	7803.6
T	1174.7	13238.4	160.75	2146.79
T	683.06	13218.4	129.16	1581.69
T	437.06	2512.23	125.72	1408.98
T	422.22	14111.2	174.25	10016.2
T	1523.76	13351.5	116.41	10909.2
T	195.56	121.54	36.82	6352.04
T	424.91	583.81	90.33	8857.57
T	615.01	11956.2	148.15	989.13
T	154.22	551.73	33.01	10251.3
T	1743.62	16301.1	98.96	67.56
T	986.32	14295.8	60.25	11309.4
T	1104.54	10273.8	169.05	49.75
T	1108.2	13802.1	205.82	5863.62
T	2349.83	15675.5	311.82	34.67
T	970.45	4584.71	109.93	10430.4
T	303.16	4846.89	70.5	3544.88
T	192.72	4224.38	71.43	7417.34
T	289.89	1542.38	41.81	10255.7
T	809.9	8648.15	133.94	257.12
T	272.1	283.92	28.87	4492.46
T	350.94	2387.94	21.84	185.23
T	56.29	7180.05	73.29	4767.46
T	217	9106.33	55.18	1614.93
T	466.16	7040.26	60.14	8790.67
T	768.8	2278.52	98.92	1436.7
T	439	12484.8	67.26	10559.4
T	406.09	2201.55	100.48	1463.51
T	725.57	6767.69	78.27	521.31
T	741.31	14066.2	44.94	1034.63
T	1011.41	16258.6	112.57	809.05
T	469.93	2325.48	130.16	1436.83
T	61.93	278.04	8.69	8964.67
T	612.37	14465.4	136.68	1870.53
T	484.79	14470	124.4	1740.57
T	539.77	14261.9	73.57	983.36
T	258.27	1235.26	77.7	8804.28
T	146.18	3399.5	63.85	10318.5
T	3002.56	15573.5	253.28	7258.54
T	470.62	2199.77	81.65	1625.38
T	1099.09	8853.45	156.25	13164.5
T	2000.79	9156.51	78.88	776.3
T	2242.96	14704.6	137.81	29.96
T	1564.97	13842.5	374.5	11251.7
T	426.21	12872.9	80.96	7682.11
T	516.96	10218	65.19	3949.73
T	363.17	1324.72	75.57	191.17
T	685.31	9633.2	71.24	253.42
T	637.86	10212.5	220.43	390.05
T	1302.27	8415	59.22	6658.16
T	497.77	6233.41	147.16	7164.77
T	1234.2	9066.45	106.97	1329.24
T	262.32	1351.28	61.37	9098.95
T	565.03	11162	81.31	5587.19
T	2004.33	9354.9	71.91	29.09
T	481.91	10965.1	79.2	880.23
T	828.73	3774.02	84.18	617.91
T	281.12	9149.59	65.88	8328.16
T	314.45	4578.68	81.35	6409.86
T	723.98	10184.2	55.03	11965.5
T	377.77	10227.9	66.95	5622.55
T	1209.01	11118.5	71.33	4203.7
T	2021.08	10473.1	109.05	858.59
T	548.74	12787.9	202.95	43.71
T	216.07	1193.67	117.57	1599.68
T	309.09	494.95	50.07	9109.5
T	344.83	362.57	60.06	8532.08
T	292.36	8494.15	64.32	1645.18
T	308.12	1929.27	158.02	152.91
T	283.91	8182.45	89.26	6564.53
T	83.97	6871.18	142.47	114.22
N	4208.53	14587.5	683.34	89.04
N	1864.97	11891.9	159.14	191.5
N	1497.58	7604.43	177.22	768.57
N	1682.46	13493.9	259.73	296.14
N	2317.41	13302.1	180.29	1494.13
N	1828.58	14622.1	333.75	189.03
N	1415.79	14142.2	202.22	176.49
N	1605.15	13471	141.11	336.57
N	3241.19	13189.4	265.5	284.53
N	1953.65	14511.9	175.69	222.9
N	3741.19	11623.7	197.44	97.81
N	3175.99	14148.8	211.94	365.32
N	551.14	12475.4	54.48	1445.71
N	1213.95	11187.4	139.82	271.34
N	1517.22	13871.4	275.23	49.07
N	3335.28	15249.7	606.43	26.37
N	1264.51	14062.1	117.33	95.01
N	3963.82	14552	281.09	214.6
N	2474.11	12829.7	264.71	272.05
N	2636.93	13465.4	184.15	59.92
N	3936.28	14931.4	361.66	133.37
N	929.81	12627.6	66.44	175.18
N	3030.45	12464.5	275.22	213.96
N	1889.66	14331.9	221.21	381.68
N	2275.39	12748.4	200.57	389.95
N	3313.05	14252.1	255.5	86.61
N	1008.68	13047.2	139.91	5167.04
N	2890.97	12323.9	150.66	261.26
N	3562.99	14183.3	374.29	355.64
N	1551.12	13338.2	150.92	1013.61
N	2331.01	15044.3	254.26	443.95
N	2781.68	11671.6	237.79	1648.73
N	3162.63	14415.7	95.06	189.24
N	2665.96	15233.8	190.23	343.24
N	2619.36	15533.3	236.93	104.38
N	4117.41	15528.1	322.2	161.1
N	2798.11	10782.2	248.42	210.61
N	2401.17	13396.1	186.91	732.87
N	2918.88	14313.4	310.15	194.91
N	3542.59	16684.9	222.09	163.84
N	2690.05	14821.1	289.24	167.52
N	2234.37	14888.8	304.29	147.18
N	2126.53	14092.8	196.75	208.11
N	3649.75	14901.6	362.74	42.71
N	2696.11	14342.9	283.29	344.47
N	2032.66	14539.6	230.53	19.83
N	1067.03	4957.08	122.51	653.85
N	2480.54	10887.2	219.43	528.94
N	536.26	14300.9	102.17	50.89
N	1130.28	7256.64	184.53	481.99
N	2705.8	13177.7	217.02	2060.85
N	1569.56	14374.8	140.68	107.87
N	3812.18	14355.8	197.77	321.26
N	3449.74	12561.8	131.17	165.28
N	2532.99	12941.8	195.42	473.53
N	1839.81	14523.9	191.63	351.33
N	4171.66	14673.4	413.69	61.9
N	3688.67	14260.5	200.3	382.23
N	3014.93	12120.9	93.3	552.66
N	2869.18	10097.2	170.42	119.47
